# Supplementary material for: Polyacrylamide hydrogel-derived three-dimensional hierarchical porous N,S co-doped carbon frameworks for electrochemical capacitors
Source: Royal Society of Chemistry journal article supplement (doi:10.1039/d0nj04942e), 2020-01-01
Supplement: d0nj04942e1.pdf [file d0nj04942e1.pdf]

## Electronic Supporting Information

### **Polyacrylamide hydrogel derived three-dimensional hierarchical porous N, S co-doped carbon framework for electrochemical capacitors**

Xiaotang Meng,<sup>†</sup> Jinyang Zhang,<sup>†</sup> Qiuli Chen, Linrui Hou, Changzhou Yuan\*

School of Material Science & Engineering, University of Jinan, Jinan, 250022, P. R.

China

\*E-mail: [mse\\_yuancz@ujn.edu.cn](mailto:mse_yuancz@ujn.edu.cn); [ayuancz@163.com](mailto:ayuancz@163.com)

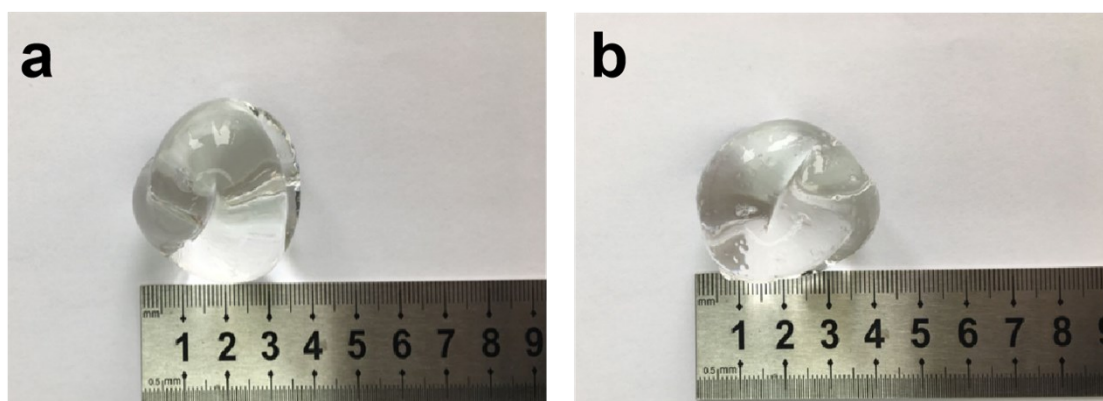

**Fig. S1** Digital images of the PAAG hydrogel (a) without and (b) with the soaked  $\text{CH}_4\text{N}_2\text{S}$ .

**Table S1** XPS relative contents of C, O, N and S species in the HNC-F and HNSC-F.

|                                     |       | HNC-F | HNSC-F |
|-------------------------------------|-------|-------|--------|
| elemental<br>percentages<br>(at. %) | C     | ~88.5 | ~85.5  |
|                                     | C- I  | 21.4  | 22.9   |
|                                     | C- II | 13.6  | 53.5   |
|                                     | C-III | 6.6   | 5.62   |
|                                     | C-IV  | 4.6   | 3.5    |
|                                     | O     | ~6.7  | ~8.4   |
|                                     | O- I  | 2.1   | 1.9    |
|                                     | O- II | 2.9   | 3.1    |
|                                     | O-III | 1.7   | 3.4    |
|                                     | N     | ~4.9  | ~5.3   |
|                                     | N- I  | 1.1   | 1.7    |
|                                     | N- II | 1.2   | 1.3    |
|                                     | N-III | 2.2   | 2.3    |
|                                     | N-IV  | 0.4   | 0.5    |
|                                     | S     | ~0    | ~0.8   |
|                                     | S- I  | -     | 0.2    |
| S- II                               | -     | 0.2   |        |
| S-3                                 |       |       |        |

|       |   |      |
|-------|---|------|
| S-III | - | 0.2  |
| S-IV  | - | 0.05 |
| S-V   | - | 0.1  |

---

**Table S2** EIS fitting parameters of the HNC-F and HNSC-F electrodes.

| Parameters | HNC-F  | HNSC-F |
|------------|--------|--------|
| $R_s$      | 0.45   | 0.12   |
| $R_{ct}$   | 4.4    | 2.2    |
| $C$        | 0.0044 | 1.20   |
| $Z_1$      | 0.083  | 1.13   |
| $Z_2$      | 0.04   | 0.02   |
| $Q$        | 0.35   | 0.074  |

**Table S3** Comparison in electrochemical properties of the HNSC-F electrode in three-electrode system with other heteroatom-doped carbon electrodes reported in literatures

| <b>Materials</b> | <b>Doped element</b> | <b>Electrolyte</b>                 | <b>SC<br/>(F g<sup>-1</sup>)<br/><sup>1)</sup></b> | <b>VSC<br/>(F cm<sup>-3</sup>)<br/><sup>3)</sup></b> | <b>Current density<br/>(A g<sup>-1</sup>)</b> | <b>Ref.</b> |
|------------------|----------------------|------------------------------------|----------------------------------------------------|------------------------------------------------------|-----------------------------------------------|-------------|
| HNSC-F           | N, S                 | 6 M KOH                            | 254.4                                              | 256.9                                                | 0.5                                           | This work   |
|                  |                      | 1 M H <sub>2</sub> SO <sub>4</sub> | 325.8                                              | 329.1                                                |                                               |             |
| S-PGHS-900       | S                    | 0.1 M KOH                          | 240                                                | -                                                    | 0.5                                           | 1           |
| MCF              | N                    | 6 M KOH                            | 247.8                                              | 171.8                                                | 0.5                                           | 2           |
|                  |                      | 1 M H <sub>2</sub> SO <sub>4</sub> | 307.4                                              | 212.1                                                |                                               |             |
| N/P-TR GO        | N, P                 | 6 M KOH                            | 165                                                | -                                                    | 0.5                                           | 3           |

|                          |      |                                    |     |   |     |    |
|--------------------------|------|------------------------------------|-----|---|-----|----|
| BNC-20                   | B, N | 6 M KOH                            | 188 | - | 0.1 | 4  |
| BHAC-850                 | B, N | 6 M KOH                            | 175 | - | 0.5 | 5  |
| MBCP                     | N, S | 6 M KOH                            | 221 | - | 0.5 | 6  |
| Asn-5-NaHCO <sub>3</sub> | N, S | 1 M H <sub>2</sub> SO <sub>4</sub> | 220 | - | 0.5 | 7  |
| C-700-1.5                | N    | 1 M H <sub>2</sub> SO <sub>4</sub> | 280 | - | 0.2 | 8  |
| PM-600-1.0               | N    | 1 M H <sub>2</sub> SO <sub>4</sub> | 278 | - | 0.1 | 9  |
| NHG                      | N    | 2 M H <sub>2</sub> SO <sub>4</sub> | 295 | - | 0.5 | 10 |

---

## References

- 1 X. Chen, X. Chen, X. Xu, Z. Yang, Z. Liu, L. Zhang, X. Xu, Y. Chen and S. Huang, *Nanoscale*, 2014, **6**, 13740-13747.
- 2 L. Hou, Z. Chen, Z. Zhao, X. Sun, J. Zhang and C. Yuan, *ACS Appl. Energy Mater.*, 2018, **2**, 548-557.
- 3 C. Wang, Y. Zhou, L. Sun, Q. Zhao, X. Zhang, P. Wan and J. Qiu, *J. Phys. Chem. C*, 2013, **117**, 14912-14919.
- 4 L. Luo, Y. Zhou, W. Yan, X. Wu, S. Wang and W. Zhao, *Electrochim. Acta*, 2020, **360**, 137010.
- 5 Q. Lu, Y.-y. Xu, S.-j. Mu and W.-c. Li, *New Carbon Mater.*, 2017, **32**, 442-450.
- 6 P.-G. Ren, W. He, Z. Dai, X. Hou, F. Ren and Y.-L. Jin, *Diamond Relat. Mater.*, 2020, **109**, 108028.
- 7 H. Zhou, Y. Zhou, S. Wu, L. Li, Y. Li, M. Guo, Z. Qi and C. Feng, *J. Alloys*

- Compd.*, 2020, **829**, 154549.
- 8 J. Jiang, L. Bao, Y. Qiang, Y. Xiong, J. Chen, S. Guan and J. Chen, *Electrochim. Acta*, 2015, **158**, 229-236.
- 9 J. Jiang, H. Chen, Z. Wang, L. Bao, Y. Qiang, S. Guan and J. Chen, *J. Colloid Interface Sci.*, 2015, **452**, 54-61.
- 10 Z.-j. Jiang, Z. Jiang and W. Chen, *J. Power Sources*, 2014, **251**, 55-65.
